# Supplementary material for: A reusable, locally manufactured, half- face respirator provides better protection than fitted disposable N95 masks: development and quantitative fit-testing comparison
Source: Research Square preprint supplement (doi:10.21203/rs.3.rs-456096/v1), 2021-05-14
Supplement: Supplementary file 3 [file 08c0875a19805183c1eb711f.xlsx]

## Sheet: Deidentified Dataset N95 & Duo
Study Identification		Demographic Information									3M N95														Duo															Feedback
Study ID	Date of Test (yyyy/mm/dd)	Age (Years)	Sex (M/F)	Height (cm)	Weight (kg)	BMI (kg/m^2)	Face Width (mm)	Face Length (mm)	NIOSH Panel	Naso-Menton Distance (mm)	3M Model	Negative Pressure Test	Run #1 Normal Breathing	Run #2 Deep Breathing	Run #3 Head Side-to-Side	Run #4 Head Up-and-Down	Run #5 Talking out loud	Run #6 Bending over	Run #7 Normal Breathing	Overall Harmonic Fit Factor (Run 1-7)	Stationary Harmonic Fit Factor (Run 1,2,7)	Dynamic Harmonic Fit Factor (Run 3-6)	Pass/Fail (1,0)	Retest Y/N (1,0)	Run #1 Normal Breathing	Run #2 Deep Breathing	Run #3 Head Side-to-Side	Run #4 Head Up-and-Down	Run #5 Talking out loud	Run #6 Bending over	Run #7 Normal Breathing	Overall Harmonic Fit Factor (Run 1-7)	Stationary Harmonic Fit Factor (Run 1,2,7)	Dynamic Harmonic Fit Factor (Run 3-6)	Pass/Fail (1,0)	Retest Y/N (1,0)	Duo Model	Duo Size	Filter Type	Comfort (0-5)	Ease of Breathing (0-5)
1	2020-05-07	35	F	157.5	47.7	19.229	144	110	4	85	1870+	Pass	8.13	5.19	7.92	9.27	21.53	6.9	9.73	8.29417	7.16924	9.40044	0	0	11455	13817	7836	24748	2814	16099	15947	8665	13490.4	6831.71	1	0	Duo Nos	M	Mini x 2, Big Red, H100	3.5	4
2	2020-05-07	32	F	167	64	22.9481	117	114	NA	95	1870+	Pass	2368.05	346.23	1054.18	581.28	640.39	784.89	367.45	606.767	497.347	726.67	1	0	38374	15294	59543	26391	3503	99999999	29577	15042	23951.2	11759	1	0	Duo Nos	M	Big Red, Mini x 2, H100	5	5
3	2020-05-07	34	M	180	72.7	22.4383	129	129	6	105	1860	Pass	487.2	429.76	715.84	721.4	235.53	510.38	542.23	460.167	482.031	445.027	1	0	17813	23094	38783	99999999	10386	5446	132447	16962	28039.9	13084.8	1	0	Duo Nos	M	Big Red, Mini x 2, H100	5	5
4	2020-05-08	32	M	182	90	27.1706	148	135	10	120	1860	Pass	98.81	77.56	27.87	53.15	66.83	30.52	40.53	46.6321	62.9105	39.0532	0	0	3904	13045	4631	4559	979	16126	4503	3375.73	5406.58	2633.75	1	0	Duo 3	M	Yellow T3, Mini x 2	5	5
5	2020-05-08	31	F	163	58	21.83	121	115	3	100	1870+	Pass	1877	3064	1380	1335	574	810	2292	1218.27	2315.82	898.79	1	0	28214	10971	9756	20018	2287	99999999	20762	9158	17166.6	6782.88	1	0	Duo Nos	M	Big red, Mini x2, H100	4	3.5
6	2020-05-09	29	F	164	54	20.0773	115	114	NA	90	1870+	Pass	1395	409	665	696	611	372	526	567.797	592.537	550.557	1	0	25715.7	15599.6	28520.7	17360	1692	32082	60344	8390	25091.5	5595.56	1	0	Duo Nos	M	Big red, Mini x 2, H100	4	4
7	2020-05-10	33	M	178	74	23.3556	132	130	6	105	8210	Pass	777.56	369.77	490.08	234.05	367.66	443.08	692.2	418.534	551.965	354.299	1	0	9999999	99999999	24424	19822	2748	9921	57569	12207	171620	7193.08	1	0	Duo Int	M	Big red, Mini x 2, H100	5	4
8	2020-05-11	46	M	178	75	23.6713	133	126	6	105	1870+	Pass	161.69	134.29	184.13	84.57	233.69	138.67	270.25	151.918	173.095	139.15	1	0	24091	7167	27507	8965	5159	2746	315	1724	894.017	5666.51	1	1	Duo Int	M	Red Big, Mini x 2, H100	4	3.5
9	2020-05-11	29	F	167	58	20.7967	116	110	NA	97.5	1870+	Pass	48.58	74.1	41.21	40.9	25.78	39.85	52.25	42.22	56.3712	35.5241	0	1	8540.27	8631.06	14614.3	10058.7	4450	183.97	139.93	530	406.538	686.315	1	0	Duo Nos	M	Mini 2, Big Red	3	3
10	2020-05-13	37	M	178	72.7	22.9453	126	115	3	95	8210	Pass	432.84	321.21	238.19	155.21	183.96	120.35	180.16	197.96	273.369	164.027	1	0	11869	8666	3896	3330	641	7430	16987	2787	11604.7	1776.49	1	0	Duo Nos	M	Mini 2, Big Red	5	5
11	2020-05-13	34	F	168	54	19.1327	112	120	NA	100	1860S	Pass	231.8	58.85	242.73	126.41	73	28	179	79	111.553	65.1005	0	0	35284	8194	7749	14400	2085	30413	11235	7366	12531.9	5625.96	1	0	Duo Nos	M	Mini x 2, Big red, H100	3	5
12	2020-05-14	40	M	169	53	18.5568	132	118	3	92	1870+	Pass	980.47	441.23	750.38	576.82	350.82	643.04	829.86	585.06	667.953	535.341	1	0	47858	29915	33186	23058	3676	99999999	70143	16903	43744.7	11575.9	1	1	Duo 1	M	Red T3, Mini x 2	4	5
13	2020-05-14	36	M	178	83	26.1962	135	124	7	115	8210	Pass	269.68	120.25	149.17	131.27	97.77	179.59	365.92	155.99	203.294	132.811	1	0	27219	7256	17555	5047	1786	4553	5295	5006.94	8255.06	3866.05	1	0	Duo Int	M	Big red, Mini x 2, H100	4	4
14	2020-05-14	36	M	190	110	30.4709	139	117	4	95	1860	Pass	174.85	93.82	187.36	127.94	112.95	134.34	220.89	139.01	143.506	135.82	1	0	7643	6397	4570	8170	2927	7242	7311	5623	7076.44	4872.42	1	0	Duo Int	M	Red T3, Mini x 2 (new), H100	4	5
15	2020-05-26	33	M	186	85	24.5693	135	127	7	102	1870+	Pass	2028.9	929.43	354.47	641.96	498.59	643.03	1503.23	688.05	1342.86	503.801	1	1	1548	2574	3329	3781	1381	2808	3558	2364	2280.41	2431.45	1	0	Duo 3	M	Red T3, Mini/AirGuard	4	5
16	2020-05-18	30	M	174	80	26.4236	147	129	10	100	1860	Pass	157.4	99.7	95.7	112.5	88.4	71.1	130.7	101.8	124.821	89.4552	0	0	10905	27432	6921	36019	1385	16667	7975	5796	11832.1	4191.68	1	1	Duo 1	M	Red T3, Mini x 2	5	5
17	2020-05-21	36	M	183	76	22.694	143	130	9	120	1870+	Pass	167.5	96.1	134	160.5	128.9	109.7	162.5	131.8	133.157	130.86	1	0	12636	28318	19663	19085	2016	99999999	99999999	9809	26209.5	6674.5	1	0	Duo Nos	M	Red T3, Mini x2	4	3.5
18	2020-05-21	43	F	161	52	20.061	124	111	3	100	1860S	Pass	156	87.9	142.5	150.7	138.5	105	332	136.7	144.239	131.591	1	0	5238	7818	49709	11694	874	4895	20067	3841	8137.68	2750.87	1	0	Duo Int	M	Big Red, Mini x2, H100	4	4
19	2020-05-21	36	M	185	79.5	23.2286	121	119	6	105	8210	Pass	108.4	111.8	148.25	128.06	164.1	114.2	199.2	133.1	129.368	136.033	1	1	16660	12925	31978	61640	1997	6968	20172	7966	16045.6	5782.36	1	0	Duo Nos	M	Big Red, Mini x 2, H100	5	3
20	2020-05-21	35	M	179	79	24.6559	145	122	7	108	1860	Pass	52.94	99.5	111	103	81	79	112.5	86	79.3054	91.4878	0	0	4650.7	4282.65	6598.77	8988.16	1148.02	4327	5083.62	3482	4649.49	2930.46	1	0	Duo Nos	M	Big Red, Mini x 2, H100	4.5	4.5
21	2020-05-23	29	F	178	68	21.4619	144	115	5	92	1870+	Pass	425	240	254	143	210	136	273	210	294.62	173.574	1	0	17303	17097	32909	9161	2995	19536	44425	10552	21614.9	7624.53	1	0	Duo Nos	M	Mini x2, Red Big, H100	4	4
22	2020-05-23	28	F	157	47	19.0677	148	108	5	101	1870+	Pass	67	68	70	40	84	53	77	62	70.3923	57.0952	0	0	21588	16341	9171	14346	6578	20588	23123	13209	19898.5	10544.7	1	0	Duo Nos	M	Mini x 2, Red Big, H100	4.5	4.5
23	2020-05-23	29	F	153	52	22.2137	135	127	7	101	1860S	Pass	147	103	151	122.5	103	76	139	114	126.552	106.235	1	0	9132	6967	18448	4863	1463	2437	4387	3816	6237.2	2954.85	1	0	Duo Nos	M	Mini x 2, Red T3 (old), H100	4	5
24	2020-05-29	28	F	152	44	19.0443	136	112	4	106	1870+	Pass	410	162	223	207	87	134	142	160	191.643	141.482	1	0	2411	2951	1807	2547	1895	1946	3075	2282	2780.77	2012.48	1	0	Duo 1	M	Mini x2, Red T3 (old)	5	5
25	2020-05-29	31	F	156	46	18.902	116	120	NA	112	1860S	Pass	14	21	12	12	19	13.5	28	16	19.3846	13.6346	0	0	1171	1745	1175	1427	1047	291	567	767	940.231	673.019	1	0	Duo 4	M	Mini x2, Red T3 (new)	4	5
26	2020-05-29	49	M	174	77.5	25.5978	144	120	7	117	1860	Pass	90	91	99.4	80.2	93.8	54.5	121	85.5	98.7993	77.6114	0	0	3780	4556	99999999	41863	3611	46796	2806	6028	3569.64	12414.7	1	0	Duo 1	M	Mini x2, Red T3 (new)	4	5
27	2020-05-29	26	F	178	73	23.04	135	128	7	105	8210	pass	181	327	557	277	63	134	145	159	193.804	139.173	1	0	957	1711	1583	1956	1856	3116	1971	1691	1404.01	1997.33	1	0	Duo 3	M	Mini x2, Red T3 (new)	5	5
28	2020-05-29	34	M	180	92	28.3951	160	140	NA	120	8210	Pass	76	67	71	98	42	59	77	66	73.0455	61.4937	0	0	2130	2403	2562	1551	1095	1386	1867	1711	2110.82	1498.24	1	0	Duo 4	M	Mini x2, Red T3 (new)	3	4
29	2020-05-30	43	F	157	53	21.5019	125	117	3	102	1860S	Pass	71.7	85.2	101	77.2	34.5	64.3	94.5	67.5	82.7219	59.3543	0	0	2582	1608	2536	1530	918	1771	2154	1847.92	2036.05	1480.44	1	0	Duo 3	M	Mini x2, Red T3 (new)	2.5	3
30	2020-05-30	36	F	150	48	21.3333	136	114	4	101	1870+	Pass	80.7	93.6	93.6	121	138	68.9	69.2	89.5	79.9441	98.2598	0	0	2649	5382	2931	3785	2681	3037	3334	3224	3475.26	3058.93	1	0	Duo 5	M	Mini x2, Red T3 (new)	2	3
31	2020-05-30	42	F	157	51	20.6905	125	108	1	98	1870+	Pass	180	125	182	148	45.8	157	166	117	153.22	98.8759	1	0	11917	36483	24272	13755	4166	16084	11984	11459	15402.9	9612.78	1	1	Duo 1	M	Mini x2, Red T3 (new)	4	5
32	2020-06-01	59	F	157	57	23.1247	131	116	3	101	1870+	Pass	787	196	478	495	121	343	240	271	284.647	261.572	1	0	3143	4105	2011	1186	1590	1398	1918	1857.84	2769.7	1489.94	1	0	Duo 3	M	Mini x 2, Red T3 (old)	5	5
33	2020-06-01	39	M	183	113	33.7424	148	131	8	110	1870+	Pass	418	356	233	174	67	181	213	173	303.148	131.194	1	0	1666	1807	2521	6199	2395	4776	2125	2492	1847.03	3375.81	1	0	Duo 3	M	Mini x2, Red T3 (old)	4	3
34	2020-06-02	42	M	178	79	24.9337	138	125	7	109	1860	Pass	68	55.6	65.8	66	35.7	46.9	94.2	57	69.2725	50.1994	0	0	1330	1219	5353	2735	1991	2295	5777	2163	1718.88	2683.79	1	1	Duo 5	M	Mini x2, Red T3 (old)	3	3
35	2020-06-02	30	M	180	66	20.3704	136	126	6	115	1870+	Pass	439	247	445	341	274	321	374	334	333.323	334.878	1	0	3018	4146	10045	6932	3445	5690	10119	5068.06	4468.5	5635.13	1	1	Duo 1	M	Mini x2, Red T3 (old)	5	5
36	2020-06-03	47	M	175	73	23.8367	137	127	7	117	1860	Pass	73.3	115	87.1	100	29.9	74.5	140	71.6	101.76	58.5234	0	0	18147	62981	14522	33101	3160	11669	6850	9746	13826.9	7980.46	1	0	Duo 3	M	Mini x2, Red T3 (old)	4	5
37	2020-06-03	28	F	173	59	19.7133	125	118	3	109	9105S	Pass	152.2	52.3	147	95.5	60.4	43.3	133	77.7	90.3354	70.268	0	0	2727	5404	1266	2157	1737	2295	2933	2217	3360.59	1766.06	1	0	Duo 1	M	Mini x2, Red T3 (old)	2	3
38	2020-06-03	39	M	157	56	22.719	151	113	5	105	1860S	Pass	196	116	133	157	134	123	175	143	154.345	135.681	1	0	21877	32055	4827	8615	1361	12891	7601	5208	14390.7	3522.45	1	0	Duo 5	M	Mini x2, Red T3 (old)	2	4
39	2020-06-19	46	M	182	93	28.0763	135	139	9	110	1860	Pass	73.9	82.9	70	56.54	110.31	54.4	82.28	72.04	79.4741	67.3174	0	1	1301	1736	1227.76	955.29	914	1006	1185	1140	1370.77	1012.81	1	0	Duo Nos	M	Mini x2, Big Red, H100	3.5	4
40	2020-06-19	33	F	160	54	21.0937	130	110	1	100	1870+	Pass	866.79	657.21	535.16	817.69	319.27	356.03	1232.77	559.15	860.475	442.848	1	0	3144.98	11539	8183.54	7580.26	1814.09	5023.35	7316.48	4528.59	5542.14	3982.36	1	0	Duo Nos	M	Mini x2, Big Red, H100	2	3
41	2020-06-19	44	F	163	52	19.5717	110	95	NA	90	1860S	Pass	42.8	26.42	56.73	50.49	36.28	36.16	54.4	40.64	37.6899	43.1725	0	1	1964.6	1954.84	3393.56	2935.41	2775.4	6299.7	4367.34	2911.11	2400.9	3465.03	1	0	Duo Nos	M	Mini x2, Big Red, H100	4	4
